# Supplementary material for: Determinants for the effectiveness of implementing an occupational therapy intervention in routine dementia care
Source: PubMed Central journal article supplement (PMC4226207; doi:10.1186/1748-5908-8-131), 2013-11-07
Supplement: 1748-5908-8-131-S5.pdf [file 1748-5908-8-131-S5.pdf]

**Additional file 5 - Determinants per theme of implementing the COTiD program as identified by each professional group via focus groups and interviews**

| OCCUPATIONAL THERAPISTS                                                                        |        | MANAGERS                                                     |        | PHYSICIANS                                                         |        |
|------------------------------------------------------------------------------------------------|--------|--------------------------------------------------------------|--------|--------------------------------------------------------------------|--------|
| <b><i>Determinant of the implementation strategy</i></b>                                       |        |                                                              |        |                                                                    |        |
| Poor communication on the aim of the strategies                                                | -      | Method of dissemination used (e.g. email, telephone)         | Varied | Method of dissemination used (e.g. email, telephone)               | Varied |
| Extensive amount of travel time required                                                       | -      | Reminder function of the strategy                            | +      | Reminder function of the strategy                                  | +      |
| Balance between travel time and added value of meetings                                        | Varied | Added value of the newsletters, website, and telephone calls | Varied | Added value of telephone calls                                     | Varied |
| Too short (supported) implementation period / lack of time to get experienced with the program | -      |                                                              |        | Main focus of telephone calls on inclusion of clients in the trial | -      |
| Lack of compatibility with clinical practice and clinicians preferences.                       | -      |                                                              |        |                                                                    |        |
| Doubts about the security of the web-based system                                              | -      |                                                              |        |                                                                    |        |
| Main focus on improving promotional skills                                                     | + / -  |                                                              |        |                                                                    |        |
| Focus on both promotional skills and practical skills                                          | +      |                                                              |        |                                                                    |        |
| Focus of coaching on individual problems                                                       | +      |                                                              |        |                                                                    |        |
| Opportunity to exchange experiences with colleagues                                            | +      |                                                              |        |                                                                    |        |

|                                                          |   |                                                                          |        |                                                                                           |        |
|----------------------------------------------------------|---|--------------------------------------------------------------------------|--------|-------------------------------------------------------------------------------------------|--------|
| Too little obligatory aspects                            | - |                                                                          |        |                                                                                           |        |
| Degree to which the intervention serves as a “big stick” | + |                                                                          |        |                                                                                           |        |
| <b><i>Determinants related to the innovation</i></b>     |   |                                                                          |        |                                                                                           |        |
|                                                          |   | Perceived overlap with OT and services of other professionals            | -      | Perceived overlap with OT and services of other professionals                             | -      |
|                                                          |   | Additional value of OT / effect of the intervention in clinical practice | Varied | Additional value of OT / effect of the intervention in clinical practice                  | Varied |
|                                                          |   | Balance between cost and effects                                         | Varied |                                                                                           |        |
| <b><i>Determinants related to the professional</i></b>   |   |                                                                          |        |                                                                                           |        |
| Lack of experience in using the COTiD program            | - | Perception that OTs do not need support in the implementation process    | -      | Familiarity with the OT / COTiD program                                                   | +      |
| Commitment                                               | + | Lack of support in the implementation process                            | Varied | Lack of eligible clients                                                                  | -      |
|                                                          |   | Positive attitude toward home-based OT                                   | +      | Limited knowledge of psychosocial interventions / lack of awareness of beneficial effects | -      |
|                                                          |   | Self-perceived role in the implementation process                        | Varied |                                                                                           |        |
|                                                          |   | Need for additional information and tools                                | -      |                                                                                           |        |
|                                                          |   | Having other priorities                                                  | -      |                                                                                           |        |
| <b><i>Determinants related to the organization</i></b>   |   |                                                                          |        |                                                                                           |        |
| Organizational pressure to maintain                      | - | Organizational pressure for OTs to maintain                              | -      | Work-load pressure                                                                        | -      |

|                                                                    |   |                                                                    |        |                               |   |
|--------------------------------------------------------------------|---|--------------------------------------------------------------------|--------|-------------------------------|---|
| certain balance between direct (patient) time and non-direct time. |   | certain balance between direct (patient) time and non-direct time. |        |                               |   |
| Work-load pressure                                                 | - | Available capacity of OTs                                          | Varied |                               |   |
|                                                                    |   | Promoting the COTiD program                                        | +      |                               |   |
|                                                                    |   | Available number of trained OTs                                    | Varied |                               |   |
|                                                                    |   | Size of the region the organization needs to cover                 | Varied |                               |   |
|                                                                    |   | Available budget                                                   | Varied |                               |   |
|                                                                    |   | Demand for OT                                                      | Varied |                               |   |
|                                                                    |   | Focus of the organization on dementia care                         | +      |                               |   |
|                                                                    |   | Attitude toward COTiD of other managers in the organization        | Varied |                               |   |
|                                                                    |   | Presence of OTs in multidisciplinary meetings                      | +      |                               |   |
|                                                                    |   | Collaboration between professionals and departments                | +      |                               |   |
| <b><i>Determinants of the social-political context</i></b>         |   |                                                                    |        |                               |   |
| Lack of physicians with sufficient number of eligible clients      | - | Clear position for OTs in regional networks                        | +      | Face-to-face contact with OTs | + |
| Promoting OT through other professionals in the physicians network | + | Face-to-face contact between OTs and general practitioners         | +      |                               |   |
|                                                                    |   | Promoting OT through other professionals in the physicians network | +      |                               |   |

|  |  |                                                           |        |  |  |
|--|--|-----------------------------------------------------------|--------|--|--|
|  |  | Use of successful cases in promoting OT toward physicians | +      |  |  |
|  |  | Method of reimbursement                                   | varied |  |  |

+ / - = positive or negative influence on implementation; Varied = the direction of the effect varied depending on the respondents; OT = occupational therapist; COTiD = community occupational therapy in dementia
